# Supplementary material for: Hepatic Expression of the Na+-Taurocholate Cotransporting Polypeptide Is Independent from Genetic Variation
Source: MDPI journal article supplement (doi:10.3390/ijms23137468), 2022-07-05
Supplement: s1 [file s1]

# **Supplementary Materials: Hepatic Expression of the Na<sup>+</sup>-Taurocholate Cotransporting Polypeptide is Independent from Genetic Variation**

Roman Tremmel, Anne T. Nies, Barbara A.C. van Eijck, Niklas Handin, Mathias Haag, Stefan Winter, Florian A. Büttner, Charlotte Kölz, Franziska Klein, Pascale Mazzola, Ute Hofmann, Kathrin Klein, Per Hoffmann, Markus M. Nöthen, Fabienne Z. Gaugaz, Per Artursson, Matthias Schwab and Elke Schaeffeler

**Supplementary Tables 1-8 (page 2-14)**

**Supplementary Figures 1-9 (page 15-24)**

**Supplementary Table S1.** Association of *SLC10A1* mRNA expression and NTCP protein levels with non-genetic factors in 143 liver subjects.

| Non-genetic demographic and clinical factors <sup>#</sup> | mRNA          | Protein       |
|-----------------------------------------------------------|---------------|---------------|
| Sex ( 68 male vs. 75 female)                              | n.s.          | n.s.          |
| Age [median = 58; range 7-85 years]                       | 0.03          | n.s.          |
| Spearman correlation                                      | $r_s = -0.19$ |               |
| Cholestasis (23 yes vs. 117 no)                           | 0.03          | n.s.          |
| Medication (38 yes vs. 105 no)                            | n.s.          | n.s.          |
| Smoking (29 yes vs. 110 no)                               | 0.006         | 0.017         |
| Alcohol consumption (46 yes vs. 92 no)                    | 0.002         | 0.005         |
| CRP [range 0.1 – 21.1mg/ml]                               | <0.0001       | <0.0009       |
| Spearman correlation                                      | $r_s = -0.33$ | $r_s = -0.28$ |

Effects of non-genetic factors on the *SLC10A1* mRNA expression and NTCP protein abundance was tested either by Spearman correlation tests or Wilcoxon-Mann-Whitney tests. Cholestasis, medication, smoking and alcohol consumption were defined as previously described in Nies et al. 2009 [67].

Abbreviations:  $r_s$  = Spearman correlation coefficient; n.s., not significant ( $P > 0.05$ ). <sup>#</sup>Numbers are not summing up to 143 due to missing data.

**Supplementary Table S2.** Annotations and frequency distribution of genetic variants in the *SLC10A1* gene region on chromosome 14.

| Position<br>(hg19) | rs number<br>(dbSNP) | Nucleotide        | Amino<br>acid | Localization | HWE  | A/A | A/B | B/B | Missing | MAF  | Method     |
|--------------------|----------------------|-------------------|---------------|--------------|------|-----|-----|-----|---------|------|------------|
| 70266071           | rs10685904           | ->AC              | -             | promoter     | 1.00 | 117 | 25  | 1   | 0       | 9.4  | N          |
| 70266071           | rs10685904*          | ->C               | -             | promoter     | 0.12 | 135 | 7   | 1   | 0       | 3.1  | N          |
| 70265937           | rs10601222           | AGA>-             | -             | promoter     | 0.21 | 92  | 42  | 9   | 0       | 21   | M, N, S    |
| 70265828           | rs7154439            | G>A               | -             | promoter     | 0.21 | 92  | 42  | 9   | 0       | 21   | M, N, S, G |
| 70265755           | rs111500198          | G>A               | -             | promoter     | 1.00 | 139 | 4   | 0   | 0       | 1.4  | M, N, G    |
| 70265632           | rs61982106           | C>T               | -             | promoter     | 1.00 | 109 | 32  | 2   | 0       | 12.6 | M, N, S    |
| 70265608           | rs72725750           | A>T               | -             | promoter     | 1.00 | 109 | 32  | 2   | 0       | 12.6 | M, N, S    |
| 70265576           | rs149651811          | A>G               | -             | promoter     | 1.00 | 139 | 4   | 0   | 0       | 1.4  | M, N, S    |
| 70265144           | rs11623504           | T>G               | -             | promoter     | 1.00 | 109 | 32  | 2   | 0       | 12.6 | I, M, N, S |
| 70264993           | rs59351911           | T>-               | -             | promoter     |      | 143 | 0   | 0   | 0       | 0    | M, N       |
| 70264895           | rs990320358          | G>A               | -             | promoter     | 1.00 | 142 | 1   | 0   | 0       | 0.3  | N, S       |
| 70264696           | rs118048231          | A>G               | -             | promoter     |      | 143 | 0   | 0   | 0       | 0    | M, N       |
| 70263911           | rs56878770           | G>C/T             | -             | 5'UTR        |      | 143 | 0   | 0   | 0       | 0    | M, N       |
| 70263855           | rs200228184          | C>T               | A6A           | exon 1       |      | 143 | 0   | 0   | 0       | 0    | M, N       |
| 70263683           | rs202018997          | C>T               | A64T          | exon 1       |      | 143 | 0   | 0   | 0       | 0    | M, N       |
| 70263648           | rs4646285            | C>T               | T75T          | exon 1       | 0.23 | 121 | 20  | 2   | 0       | 8.4  | M, N, S    |
| 70261665           | rs11622925           | C>T               | -             | intron 1     | 0.23 | 120 | 20  | 2   | 1       | 8.5  | I          |
| 70260928           | rs76385306           | A>C               | -             | intron 1     | 1    | 98  | 39  | 4   | 2       | 16.7 | G          |
| 70257369           | rs8020042            | G>A               | -             | intron 1     | 1    | 109 | 32  | 2   | 0       | 12.6 | G          |
| 70253140           | rs541613204          | C>G               | -             | intron 1     | 1.00 | 142 | 1   | 0   | 0       | 0.3  | N, S       |
| 70253139           | rs546592696          | C>-               | -             | intron 1     | 1.00 | 142 | 1   | 0   | 0       | 0.3  | N, S       |
| 70253103           | rs770421447          | CACTGTGCTAAGTGC>- | -             | intron 1     | 1.00 | 142 | 1   | 0   | 0       | 0.3  | N, S       |
| 70252928           | rs61329727           | C>T               | K151K         | exon 2       |      | 143 | 0   | 0   | 0       | 0    | M, N       |
| 70252909           | rs201339654          | C>T               | G158S         | exon 2       |      | 143 | 0   | 0   | 0       | 0    | M, N       |
| 70252900           | rs199663299          | T>A/C             | I161L/V       | exon 2       |      | 143 | 0   | 0   | 0       | 0    | M, N       |
| 70252878           | rs200153803          | A>G               | I168T         | exon 2       |      | 143 | 0   | 0   | 0       | 0    | M, N       |
| 70252828           | rs200149939          | G>A               | R185C         | exon 2       | 1.00 | 142 | 1   | 0   | 0       | 0.3  | N          |
| 70252802           | rs200579289          | C>T               | -             | intron 2     | 1.00 | 142 | 1   | 0   | 0       | 0.3  | N, S       |

| Position (hg19) | rs number (dbSNP) | Nucleotide | Amino acid | Localization | HWE  | A/A | A/B | B/B | Missing | MAF  | Method  |
|-----------------|-------------------|------------|------------|--------------|------|-----|-----|-----|---------|------|---------|
| <b>70252701</b> | chr14.70252701    | G>A        | -          | intron 2     | 1.00 | 142 | 1   | 0   | 0       | 0.3  | N, S    |
| <b>70250500</b> | rs11624523        | A>G        | -          | intron 2     | 0.22 | 88  | 42  | 9   | 4       | 21.6 | I       |
| <b>70248358</b> | rs17556915        | A>G        | -          | intron 2     | 0.80 | 89  | 49  | 5   | 0       | 20.6 | G       |
| <b>70246449</b> | rs11626135        | G>C        | -          | intron 2     | 1    | 108 | 30  | 2   | 3       | 12.1 | G       |
| <b>70246217</b> | rs139537133       | TCT>-      | -          | intron 2     | 1.00 | 109 | 32  | 2   | 0       | 12.6 | N       |
| <b>70246018</b> | rs55645214        | A>G        | N209N      | exon 3       | 1.00 | 142 | 1   | 0   | 0       | 0.3  | M, N    |
| <b>70246006</b> | rs200746820       | G>C        | S213R      | exon 3       | 1.00 | 142 | 1   | 0   | 0       | 0.3  | N       |
| <b>70245977</b> | rs61745930        | A>G        | I223T      | exon 3       |      | 143 | 0   | 0   | 0       | 0    | M, N    |
| <b>70245923</b> | rs150579813       | G>A        | S241F      | exon 3       |      | 143 | 0   | 0   | 0       | 0    | M, N    |
| <b>70245838</b> | rs186343960       | A>C        | -          | intron 3     | 1.00 | 142 | 1   | 0   | 0       | 0.3  | M, N, S |
| <b>70245407</b> | rs56063215        | A>G        | -          | intron 3     | 0.30 | 109 | 19  | 2   | 13      | 8.8  | N       |
| <b>70245239</b> | rs141269120       | G>A/T      | R252C/S    | exon 4       |      | 143 | 0   | 0   | 0       | 0    | M, N    |
| <b>70245193</b> | rs2296651         | G>A        | S267F      | exon 4       |      | 143 | 0   | 0   | 0       | 0    | M, N    |
| <b>70245157</b> | rs72547507        | A>G        | I279T      | exon 4       |      | 143 | 0   | 0   | 0       | 0    | M, N    |
| <b>70245053</b> | rs72547506        | T>C        | K314E      | exon 4       |      | 143 | 0   | 0   | 0       | 0    | M, N    |
| <b>70244900</b> | rs763689587       | T>G        | -          | intron 4     | 1.00 | 142 | 1   | 0   | 0       | 0.3  | N, S    |
| <b>70243149</b> | rs199688922       | G>C        | -          | intron 4     | 1.00 | 142 | 1   | 0   | 0       | 0.3  | M, N, S |
| <b>70242852</b> | rs45593332        | C>T        | -          | 3'UTR        | 1.00 | 135 | 8   | 0   | 0       | 2.8  | M, N, S |
| <b>70242708</b> | rs150123920       | A>G        | -          | 3'UTR        |      | 143 | 0   | 0   | 0       | 0    | M, N    |
| <b>70241873</b> | rs78852170        | G>A        | -          | 3'UTR        | 1    | 136 | 7   | 0   | 0       | 2.4  | G       |
| <b>70240103</b> | rs8013586         | C>T        | -          | downstream   | 1.00 | 107 | 32  | 2   | 2       | 12.8 | I       |
| <b>70238964</b> | rs6573908         | A>C        | -          | downstream   | 0.23 | 87  | 43  | 10  | 3       | 22.5 | I       |

\*= rs10685904 already described as -/AC insertion, but not -/C insertion.

Abbreviations: A, reference allele; B, variant allele; 3'UTR, 3' untranslated region; 5'UTR, 5' untranslated region; HWE, Hardy-Weinberg P-value; genotyping and sequencing methods: G = Infinium™ Global Screening Array-v2.0, I = Illumina HAP300, M = MALDI-TOF MS, N = NGS, S = Sanger.

**Supplementary Table S3.** *SLC10A1* haplotypes (estimated by EM algorithm) with frequencies  $\geq 1\%$  using genetic variants with  $MAF \geq 5\%$  in 143 liver samples with Caucasian ancestry and their association (R package haplo.stats::haplo.score) to *SLC10A1* mRNA (qPCR) and NTCP protein levels (LC-MS/MS proteomics).

| Haplotype | rs10685904 | rs10601222 | rs7154439 | rs61982106 | rs72725750 | rs11623504 | rs4646285 | rs11622925 | rs76385306 | rs8020042 | rs11624523 | rs17556915 | rs11626135 | rs139537133 | rs56063215 | rs8013586 | rs6573908 | Frequency<br>(EM algorithm) | P-value<br><i>SLC10A1</i> mRNA | P-value<br>NTCP protein |
|-----------|------------|------------|-----------|------------|------------|------------|-----------|------------|------------|-----------|------------|------------|------------|-------------|------------|-----------|-----------|-----------------------------|--------------------------------|-------------------------|
| 1         | -          | AGA        | G         | C          | A          | T          | C         | G          | A          | A         | A          | G          | C          | TCT         | A          | G         | A         | 0.568                       | -                              | -                       |
| 2         | -          | AGA        | G         | C          | A          | T          | C         | G          | C          | A         | A          | A          | C          | TCT         | A          | G         | A         | 0.155                       | 0.64                           | 0.05                    |
| 3         | AC         | -          | A         | T          | T          | G          | C         | G          | A          | G         | G          | G          | G          | -           | G          | A         | C         | 0.096                       | 0.77                           | 0.98                    |
| 4         | -          | -          | A         | C          | A          | T          | T         | A          | A          | A         | G          | G          | C          | TCT         | A          | G         | C         | 0.085                       | 0.80                           | 0.50                    |
| 5         | -          | AGA        | G         | C          | A          | T          | C         | G          | A          | A         | A          | A          | C          | TCT         | A          | G         | A         | 0.045                       | 0.51                           | 0.72                    |
| 6         | -          | -          | A         | T          | T          | G          | C         | G          | A          | G         | G          | G          | G          | -           | G          | A         | C         | 0.031                       | 0.77                           | 1.00                    |
| 7         | -          | AGA        | G         | C          | A          | T          | C         | G          | C          | A         | A          | G          | C          | TCT         | A          | G         | A         | 0.011                       | 0.97                           | 0.83                    |
| <1%       | *          | *          | *         | *          | *          | *          | *         | *          | *          | *         | *          | *          | *          | *           | *          | *         | *         | 0.009                       | 0.63                           | 0.25                    |

**Supplementary Table S4.** Germline variants in the *SLC10A1* gene and their association with *SLC10A1* mRNA expression in the LIHC cohort of The Cancer Genome Atlas (TCGA) (n = 50).

| Position on chr. 14 | SNP         | nucleotide change | allele count | MAF  | p-value (additive genetic model) | p-value (dominant genetic model) | p-value (recessive genetic model) |
|---------------------|-------------|-------------------|--------------|------|----------------------------------|----------------------------------|-----------------------------------|
| <b>69778377</b>     | .           | A>C               | 1            | 0.01 | -                                | -                                | -                                 |
| <b>69778383</b>     | .           | A>G               | 1            | 0.01 | -                                | -                                | -                                 |
| <b>69778561</b>     | rs10559679  | CAG>C             | 2            | 0.02 | 0.86                             | 0.86                             | -                                 |
| <b>69779260</b>     | rs61745930  | A>G               | 1            | 0.01 | -                                | -                                | -                                 |
| <b>69779301</b>     | rs55645214  | A>G               | 1            | 0.01 | -                                | -                                | -                                 |
| <b>69786331</b>     | rs375377530 | GGA>G             | 3            | 0.03 | 0.5                              | 0.5                              | -                                 |
| <b>69796931</b>     | rs4646285   | C>T               | 12           | 0.12 | 0.46                             | 0.46                             | -                                 |

chromosomal position based on hg38.

**Supplementary Table S5:** Correlation analyses of metabolite levels with *SLC10A1*/NTCP mRNA expression and protein levels. Significant associations are marked in grey.

| Metabolites                                         | SLC10A1 mRNA   |                |                |  | NTCP protein   |                |                |
|-----------------------------------------------------|----------------|----------------|----------------|--|----------------|----------------|----------------|
|                                                     | r <sub>s</sub> | Unadjusted P   | Adjusted P     |  | r <sub>s</sub> | Unadjusted P   | Adjusted P     |
| 2-Ethylacryloylcarnitine or Tiglylcarnitine         | 0.18           | <b>3.3E-02</b> | 7.6E-02        |  | -0.04          | 6.2E-01        | 7.4E-01        |
| 2-Hydroxy-butanoic acid                             | 0.19           | <b>2.2E-02</b> | 5.5E-02        |  | 0.13           | 1.1E-01        | 2.4E-01        |
| 2-Phenylacetamide                                   | 0.22           | <b>7.6E-03</b> | <b>2.9E-02</b> |  | 0.18           | <b>3.1E-02</b> | 1.4E-01        |
| 3'5'-cyclic AMP                                     | 0.30           | <b>2.6E-04</b> | <b>2.1E-03</b> |  | 0.19           | <b>2.1E-02</b> | 1.1E-01        |
| 4-Hydroxy-L-proline                                 | -0.23          | <b>6.8E-03</b> | <b>2.7E-02</b> |  | -0.15          | 7.6E-02        | 2.1E-01        |
| 4-Pyrimidine Methanamine or 2-Aminomethylpyrimidine | 0.19           | <b>2.5E-02</b> | 6.0E-02        |  | 0.13           | 1.2E-01        | 2.6E-01        |
| 5-Oxoproline                                        | 0.18           | <b>3.7E-02</b> | 8.1E-02        |  | 0.07           | 4.3E-01        | 6.1E-01        |
| Acetylcarnitine                                     | 0.06           | 4.9E-01        | 5.7E-01        |  | -0.05          | 5.8E-01        | 7.0E-01        |
| Acylcarnitine 10:0                                  | -0.10          | 2.2E-01        | 3.0E-01        |  | -0.12          | 1.4E-01        | 2.8E-01        |
| Acylcarnitine 10:1                                  | 0.24           | <b>4.2E-03</b> | <b>1.8E-02</b> |  | 0.14           | 1.0E-01        | 2.3E-01        |
| Acylcarnitine 12:0                                  | -0.02          | 7.8E-01        | 8.4E-01        |  | -0.17          | <b>3.9E-02</b> | 1.6E-01        |
| Acylcarnitine 12:1                                  | 0.10           | 2.6E-01        | 3.3E-01        |  | 0.01           | 9.4E-01        | 9.6E-01        |
| Acylcarnitine 14:0                                  | -0.11          | 1.7E-01        | 2.4E-01        |  | -0.22          | <b>8.1E-03</b> | 8.8E-02        |
| Acylcarnitine 14:1                                  | -0.01          | 8.8E-01        | 9.0E-01        |  | -0.13          | 1.3E-01        | 2.6E-01        |
| Acylcarnitine 14:2                                  | 0.16           | 6.3E-02        | 1.2E-01        |  | 0.03           | 6.8E-01        | 7.8E-01        |
| Acylcarnitine 16:0-OH                               | -0.21          | <b>1.3E-02</b> | <b>4.0E-02</b> |  | -0.26          | <b>1.8E-03</b> | 5.3E-02        |
| Acylcarnitine 16:1                                  | -0.15          | 6.9E-02        | 1.2E-01        |  | -0.18          | <b>3.6E-02</b> | 1.5E-01        |
| Acylcarnitine 16:2                                  | -0.02          | 8.1E-01        | 8.6E-01        |  | -0.06          | 4.8E-01        | 6.4E-01        |
| Acylcarnitine 18:1                                  | -0.19          | <b>2.2E-02</b> | 5.5E-02        |  | -0.16          | 6.1E-02        | 1.8E-01        |
| Acylcarnitine 18:1-OH                               | -0.20          | <b>1.7E-02</b> | <b>4.8E-02</b> |  | -0.20          | <b>1.6E-02</b> | 1.1E-01        |
| Acylcarnitine 18:2                                  | -0.08          | 3.7E-01        | 4.5E-01        |  | -0.07          | 4.1E-01        | 5.9E-01        |
| Acylcarnitine 3:0                                   | 0.40           | <b>9.6E-07</b> | <b>9.4E-05</b> |  | 0.16           | 6.5E-02        | 1.8E-01        |
| Acylcarnitine 4-OH                                  | 0.16           | 5.2E-02        | 1.1E-01        |  | 0.03           | 6.8E-01        | 7.8E-01        |
| Acylcarnitine 4:0                                   | 0.20           | <b>2.0E-02</b> | 5.3E-02        |  | 0.10           | 2.4E-01        | 4.2E-01        |
| Acylcarnitine 6:0                                   | 0.32           | <b>8.1E-05</b> | <b>1.1E-03</b> |  | 0.12           | 1.5E-01        | 2.8E-01        |
| Acylcarnitine 8:0                                   | 0.16           | 6.4E-02        | 1.2E-01        |  | 0.08           | 3.5E-01        | 5.5E-01        |
| Acylcarnitine 8:2                                   | 0.27           | <b>9.7E-04</b> | <b>6.3E-03</b> |  | 0.21           | <b>1.3E-02</b> | 1.0E-01        |
| Adenine                                             | 0.17           | <b>4.6E-02</b> | 9.6E-02        |  | 0.14           | 9.8E-02        | 2.3E-01        |
| Adenosine                                           | 0.21           | <b>1.3E-02</b> | <b>4.0E-02</b> |  | 0.14           | 8.6E-02        | 2.2E-01        |
| Alpha-Ketoglutaric acid                             | 0.30           | <b>2.5E-04</b> | <b>2.1E-03</b> |  | 0.05           | 5.4E-01        | 6.9E-01        |
| Betaine                                             | 0.34           | <b>4.1E-05</b> | <b>8.0E-04</b> |  | 0.30           | <b>3.3E-04</b> | <b>2.3E-02</b> |
| Choline                                             | 0.32           | <b>1.1E-04</b> | <b>1.2E-03</b> |  | 0.20           | <b>1.9E-02</b> | 1.1E-01        |
| Creatine                                            | 0.37           | <b>5.5E-06</b> | <b>1.3E-04</b> |  | 0.21           | <b>1.2E-02</b> | 1.0E-01        |
| Creatinine                                          | 0.21           | <b>1.4E-02</b> | <b>4.0E-02</b> |  | 0.16           | 6.5E-02        | 1.8E-01        |
| Cyclohexylsulfamate                                 | -0.14          | 1.0E-01        | 1.6E-01        |  | -0.14          | 1.0E-01        | 2.3E-01        |
| D-Pantothenic acid                                  | -0.13          | 1.3E-01        | 2.0E-01        |  | -0.06          | 5.1E-01        | 6.6E-01        |

|                                            |       |                |                |  |       |                |                |
|--------------------------------------------|-------|----------------|----------------|--|-------|----------------|----------------|
| D/L-Alanine                                | 0.27  | <b>1.3E-03</b> | <b>8.1E-03</b> |  | 0.16  | 5.3E-02        | 1.8E-01        |
| Dehydroascorbic acid                       | 0.07  | 4.2E-01        | 4.9E-01        |  | -0.15 | 8.1E-02        | 2.1E-01        |
| Deoxycarnitine                             | -0.04 | 6.5E-01        | 7.4E-01        |  | -0.08 | 3.6E-01        | 5.5E-01        |
| Ergothioneine                              | 0.29  | <b>5.5E-04</b> | <b>4.1E-03</b> |  | 0.19  | <b>2.1E-02</b> | 1.1E-01        |
| Glycine                                    | 0.33  | <b>6.2E-05</b> | <b>1.0E-03</b> |  | 0.25  | <b>3.2E-03</b> | 5.3E-02        |
| Glycine-conjugated bile acid @3.7min       | -0.26 | <b>2.0E-03</b> | <b>1.1E-02</b> |  | -0.10 | 2.2E-01        | 3.9E-01        |
| Glycine-conjugated bile acid @3.9min       | 0.01  | 8.7E-01        | 9.0E-01        |  | 0.08  | 3.2E-01        | 5.3E-01        |
| Glycine-conjugated bile acid sulfate @5min | 0.12  | 1.4E-01        | 2.1E-01        |  | 0.08  | 3.7E-01        | 5.5E-01        |
| Glycine-conjugated bile acid sulfate @7min | -0.11 | 1.9E-01        | 2.6E-01        |  | -0.06 | 5.0E-01        | 6.5E-01        |
| Glycocholic acid                           | -0.19 | <b>2.4E-02</b> | 5.8E-02        |  | 0.00  | 9.7E-01        | 9.7E-01        |
| Guanidinoacetate                           | 0.15  | 6.7E-02        | 1.2E-01        |  | 0.02  | 8.2E-01        | 8.7E-01        |
| Guanosine                                  | 0.09  | 2.6E-01        | 3.3E-01        |  | 0.07  | 4.4E-01        | 6.1E-01        |
| Hexose                                     | 0.14  | 9.8E-02        | 1.6E-01        |  | 0.02  | 8.2E-01        | 8.7E-01        |
| Hippurate                                  | 0.23  | <b>5.1E-03</b> | <b>2.1E-02</b> |  | 0.11  | 1.8E-01        | 3.3E-01        |
| Histamine                                  | -0.01 | 8.9E-01        | 9.0E-01        |  | 0.09  | 2.6E-01        | 4.5E-01        |
| Hydroxyisovalerylcarnitine                 | 0.22  | <b>9.1E-03</b> | <b>3.2E-02</b> |  | -0.01 | 9.3E-01        | 9.6E-01        |
| Hypotaurine                                | 0.07  | 3.8E-01        | 4.6E-01        |  | 0.03  | 7.4E-01        | 8.3E-01        |
| Hypoxanthine                               | 0.00  | 9.9E-01        | 9.9E-01        |  | 0.06  | 4.6E-01        | 6.1E-01        |
| Inosine                                    | 0.16  | 5.5E-02        | 1.1E-01        |  | 0.08  | 3.5E-01        | 5.5E-01        |
| Isovalerylcarnitine                        | 0.22  | <b>8.4E-03</b> | <b>3.1E-02</b> |  | 0.03  | 7.3E-01        | 8.2E-01        |
| L-Asparagine                               | 0.26  | <b>1.7E-03</b> | <b>9.4E-03</b> |  | 0.24  | <b>4.3E-03</b> | 6.1E-02        |
| L-Carnitine                                | 0.32  | <b>1.3E-04</b> | <b>1.3E-03</b> |  | 0.21  | <b>1.0E-02</b> | 1.0E-01        |
| L-Glutamic acid                            | 0.17  | <b>4.5E-02</b> | 9.6E-02        |  | 0.16  | 5.7E-02        | 1.8E-01        |
| L-Glutamine                                | 0.25  | <b>2.5E-03</b> | <b>1.2E-02</b> |  | 0.15  | 8.2E-02        | 2.1E-01        |
| L-Isoleucine                               | 0.32  | <b>1.0E-04</b> | <b>1.2E-03</b> |  | 0.22  | <b>7.9E-03</b> | 8.8E-02        |
| L-Leucine                                  | 0.26  | <b>1.6E-03</b> | <b>9.1E-03</b> |  | 0.21  | <b>1.3E-02</b> | 1.0E-01        |
| L-Methionine                               | 0.13  | 1.3E-01        | 2.0E-01        |  | 0.08  | 3.7E-01        | 5.5E-01        |
| L-Phenylalanine                            | 0.14  | 8.8E-02        | 1.5E-01        |  | 0.14  | 9.6E-02        | 2.3E-01        |
| L-Proline                                  | 0.13  | 1.2E-01        | 1.8E-01        |  | 0.10  | 2.2E-01        | 3.9E-01        |
| L-Serine                                   | -0.03 | 7.5E-01        | 8.2E-01        |  | -0.04 | 6.3E-01        | 7.4E-01        |
| L-Threonine                                | 0.21  | <b>1.2E-02</b> | <b>4.0E-02</b> |  | 0.13  | 1.3E-01        | 2.6E-01        |
| L-Tryptophan                               | 0.12  | 1.5E-01        | 2.2E-01        |  | 0.09  | 2.6E-01        | 4.5E-01        |
| L-Tyrosine                                 | 0.19  | <b>2.0E-02</b> | 5.4E-02        |  | 0.16  | 6.0E-02        | 1.8E-01        |
| Lactate                                    | 0.03  | 7.1E-01        | 7.8E-01        |  | -0.07 | 4.0E-01        | 5.9E-01        |
| LysoPC 16:1                                | -0.12 | 1.7E-01        | 2.4E-01        |  | -0.16 | 5.3E-02        | 1.8E-01        |
| LysoPC 18:1                                | -0.14 | 9.7E-02        | 1.6E-01        |  | -0.17 | <b>4.2E-02</b> | 1.6E-01        |
| LysoPC 18:2                                | 0.10  | 2.4E-01        | 3.2E-01        |  | 0.07  | 4.0E-01        | 5.9E-01        |
| LysoPE 20:4                                | -0.02 | 7.9E-01        | 8.4E-01        |  | -0.13 | 1.2E-01        | 2.6E-01        |
| Mannitol                                   | -0.03 | 7.1E-01        | 7.8E-01        |  | -0.02 | 8.1E-01        | 8.7E-01        |
| Methionine sulfoxide                       | 0.07  | 3.8E-01        | 4.6E-01        |  | -0.02 | 7.7E-01        | 8.5E-01        |
| N-Acetyl-L-aspartic acid                   | -0.24 | <b>4.2E-03</b> | <b>1.8E-02</b> |  | -0.17 | <b>4.2E-02</b> | 1.6E-01        |
| N-Acetylneuraminate                        | -0.12 | 1.7E-01        | 2.4E-01        |  | -0.16 | 5.5E-02        | 1.8E-01        |
| N-Alpha-Acetyl-L-lysine                    | 0.20  | <b>1.5E-02</b> | <b>4.3E-02</b> |  | 0.29  | <b>4.8E-04</b> | <b>2.3E-02</b> |



|                              |       |                |                |  |       |                |         |
|------------------------------|-------|----------------|----------------|--|-------|----------------|---------|
| N1-Acetylspermidine          | -0.02 | 8.4E-01        | 8.8E-01        |  | 0.05  | 5.8E-01        | 7.0E-01 |
| SM 34:2                      | -0.10 | 2.5E-01        | 3.2E-01        |  | -0.17 | <b>4.3E-02</b> | 1.6E-01 |
| SM 36:1                      | 0.15  | 6.7E-02        | 1.2E-01        |  | 0.07  | 4.4E-01        | 6.1E-01 |
| SM 38:1                      | 0.28  | <b>7.4E-04</b> | <b>5.2E-03</b> |  | 0.20  | <b>2.0E-02</b> | 1.1E-01 |
| SM 42:2                      | -0.09 | 3.1E-01        | 3.8E-01        |  | -0.05 | 5.7E-01        | 7.0E-01 |
| SN-Glycero-3-phosphocholine  | 0.38  | <b>2.3E-06</b> | <b>1.1E-04</b> |  | 0.25  | <b>2.3E-03</b> | 5.3E-02 |
| Sorbitol                     | -0.06 | 4.9E-01        | 5.7E-01        |  | -0.09 | 2.8E-01        | 4.6E-01 |
| β-Alanine                    | 0.24  | <b>3.7E-03</b> | <b>1.7E-02</b> |  | 0.19  | <b>2.5E-02</b> | 1.2E-01 |
| Succinate                    | 0.10  | 2.5E-01        | 3.2E-01        |  | 0.01  | 9.0E-01        | 9.3E-01 |
| Taurine                      | 0.05  | 5.5E-01        | 6.3E-01        |  | -0.05 | 5.8E-01        | 7.0E-01 |
| Taurine-conjugated bile acid | -0.15 | 6.9E-02        | 1.2E-01        |  | -0.02 | 8.3E-01        | 8.7E-01 |
| Taurocholic acid             | -0.16 | 6.2E-02        | 1.2E-01        |  | 0.00  | 9.7E-01        | 9.7E-01 |
| Trigonellinamide             | -0.15 | 7.3E-02        | 1.3E-01        |  | -0.12 | 1.5E-01        | 2.8E-01 |
| Trigonelline                 | -0.10 | 2.5E-01        | 3.2E-01        |  | -0.06 | 4.5E-01        | 6.1E-01 |
| Urea                         | 0.21  | <b>1.2E-02</b> | <b>4.0E-02</b> |  | 0.19  | <b>2.0E-02</b> | 1.1E-01 |
| Uridine                      | 0.18  | <b>3.0E-02</b> | 7.1E-02        |  | 0.18  | <b>2.9E-02</b> | 1.4E-01 |
| Valine                       | 0.38  | <b>4.1E-06</b> | <b>1.3E-04</b> |  | 0.25  | <b>2.8E-03</b> | 5.3E-02 |
| Xanthine                     | 0.14  | 8.7E-02        | 1.5E-01        |  | 0.12  | 1.4E-01        | 2.8E-01 |
| Xanthosine                   | 0.17  | <b>3.7E-02</b> | 8.1E-02        |  | 0.05  | 5.6E-01        | 7.0E-01 |

**Supplementary Table S6.** Association of genetic variants within *SLC10A1* promoter and gene region and metabolite levels. Univariate as well as multivariate analyses including the demographic and clinical factors were performed. Only significant associations either in the univariate analysis or the multivariate analysis (unadjusted  $P \leq 0.05$ ) are shown.

| Metabolites         | Genetic variant   | P<br>(univariate<br>analysis) | Adjusted P | P<br>(multivariate<br>analyses) | Adjusted P |
|---------------------|-------------------|-------------------------------|------------|---------------------------------|------------|
| 4-Hydroxy-L-proline | rs6573908         | 0.0196                        | 0.1797     | 0.0041                          | 0.0522     |
| 4-Hydroxy-L-proline | rs11624523        | 0.0302                        | 0.1797     | 0.0080                          | 0.0522     |
| 4-Hydroxy-L-proline | rs10601222        | 0.0327                        | 0.1797     | 0.0095                          | 0.0522     |
| 4-Hydroxy-L-proline | rs7154439         | 0.0327                        | 0.1797     | 0.0095                          | 0.0522     |
| Histamine           | rs4646285         | 0.0316                        | 0.1871     | 0.0143                          | 0.0784     |
| Histamine           | rs11624523        | 0.0379                        | 0.1871     | 0.0127                          | 0.0784     |
| Histamine           | rs10601222        | 0.0425                        | 0.1871     | 0.0140                          | 0.0784     |
| Histamine           | rs7154439         | 0.0425                        | 0.1871     | 0.0140                          | 0.0784     |
| Histamine           | rs11622925        | 0.0344                        | 0.1871     | 0.0179                          | 0.0789     |
| Adenine             | rs11624523        | 0.0221                        | 0.1953     | 0.0116                          | 0.1206     |
| Adenine             | rs10601222        | 0.0355                        | 0.1953     | 0.0165                          | 0.1206     |
| Adenine             | rs7154439         | 0.0355                        | 0.1953     | 0.0165                          | 0.1206     |
| LysoPE 20:4         | rs11626135        | 0.0430                        | 0.1537     | 0.0492                          | 0.1352     |
| LysoPE 20:4         | rs8013586         | 0.0465                        | 0.1537     | 0.0457                          | 0.1352     |
| LysoPE 20:4         | rs11623504        | 0.0489                        | 0.1537     | 0.0472                          | 0.1352     |
| LysoPE 20:4         | rs139537133       | 0.0489                        | 0.1537     | 0.0472                          | 0.1352     |
| LysoPE 20:4         | rs61982106        | 0.0489                        | 0.1537     | 0.0472                          | 0.1352     |
| LysoPE 20:4         | rs72725750        | 0.0489                        | 0.1537     | 0.0472                          | 0.1352     |
| LysoPE 20:4         | rs8020042         | 0.0489                        | 0.1537     | 0.0472                          | 0.1352     |
| LysoPE 20:4         | rs111500198       | 0.0832                        | 0.2034     | 0.0436                          | 0.1352     |
| Adenine             | rs6573908         | 0.0551                        | 0.1953     | 0.0286                          | 0.1573     |
| Xanthosine          | rs45593332        | 0.0051                        | 0.1117     | 0.0108                          | 0.2369     |
| Acylcarnitine 6:0   | rs11624523        | 0.0400                        | 0.2796     | 0.0472                          | 0.2430     |
| Acylcarnitine 6:0   | rs10601222        | 0.0429                        | 0.2796     | 0.0394                          | 0.2430     |
| Acylcarnitine 6:0   | rs7154439         | 0.0429                        | 0.2796     | 0.0394                          | 0.2430     |
| Acylcarnitine 12:1  | rs111500198       | 0.0109                        | 0.2393     | 0.0117                          | 0.2582     |
| Creatinine          | rs6573908         | 0.0179                        | 0.1897     | 0.0352                          | 0.2808     |
| Creatinine          | rs11624523        | 0.0300                        | 0.1897     | 0.0545                          | 0.2808     |
| Creatinine          | rs10601222        | 0.0345                        | 0.1897     | 0.0638                          | 0.2808     |
| Creatinine          | rs7154439         | 0.0345                        | 0.1897     | 0.0638                          | 0.2808     |
| Creatinine          | rs45593332        | 0.0942                        | 0.2961     | 0.0150                          | 0.2808     |
| L-Methionine        | rs149651811       | 0.0109                        | 0.2391     | 0.0308                          | 0.3335     |
| L-Methionine        | rs11624523        | 0.0687                        | 0.4079     | 0.0450                          | 0.3335     |
| Adenine             | rs10685904*(-/AC) | 0.0435                        | 0.1953     | 0.1390                          | 0.3387     |

|                       |                   |        |        |        |        |
|-----------------------|-------------------|--------|--------|--------|--------|
| Acetylcarnitine       | rs78852170        | 0.0211 | 0.4635 | 0.0165 | 0.3622 |
| Hypoxanthine          | rs78852170        | 0.0130 | 0.2856 | 0.0455 | 0.3814 |
| Uridine               | rs45593332        | 0.0111 | 0.2446 | 0.0174 | 0.3825 |
| Deoxycarnitine        | rs76385306        | 0.0396 | 0.7177 | 0.0178 | 0.3924 |
| Betaine               | rs11626135        | 0.0431 | 0.3089 | 0.1132 | 0.4287 |
| Acylcarnitine 3:0     | rs78852170        | 0.0253 | 0.3945 | 0.0588 | 0.4486 |
| Acylcarnitine 3:0     | rs11622925        | 0.0631 | 0.3945 | 0.0407 | 0.4486 |
| L-Proline             | rs6573908         | 0.0707 | 0.6411 | 0.0498 | 0.5219 |
| Succinate             | rs76385306        | 0.0937 | 0.6869 | 0.0239 | 0.5260 |
| Acylcarnitine 8:0     | rs4646285         | 0.0144 | 0.1578 | 0.1155 | 0.5307 |
| Acylcarnitine 8:0     | rs11622925        | 0.0146 | 0.1578 | 0.1206 | 0.5307 |
| Acylcarnitine 8:0     | rs111500198       | 0.0275 | 0.1578 | 0.0627 | 0.5307 |
| Acylcarnitine 8:0     | rs78852170        | 0.0437 | 0.1578 | 0.0679 | 0.5307 |
| Acylcarnitine 8:2     | rs78852170        | 0.0164 | 0.1518 | 0.0509 | 0.5422 |
| Acylcarnitine 8:2     | rs11622925        | 0.0275 | 0.1518 | 0.0784 | 0.5422 |
| Acylcarnitine 8:2     | rs4646285         | 0.0282 | 0.1518 | 0.0734 | 0.5422 |
| LysoPC 16:1           | rs111500198       | 0.2600 | 0.9114 | 0.0384 | 0.5497 |
| Hexose                | rs45593332        | 0.0284 | 0.6022 | 0.0510 | 0.5963 |
| L-Serine              | rs111500198       | 0.0134 | 0.2946 | 0.0284 | 0.6247 |
| Acylcarnitine 10:1    | rs10685904*(-/-C) | 0.0229 | 0.2049 | 0.0566 | 0.6490 |
| Acylcarnitine 10:1    | rs10601222        | 0.0341 | 0.2049 | 0.1452 | 0.6490 |
| Acylcarnitine 10:1    | rs7154439         | 0.0341 | 0.2049 | 0.1452 | 0.6490 |
| Acylcarnitine 10:1    | rs11624523        | 0.0373 | 0.2049 | 0.1712 | 0.6490 |
| Acylcarnitine 8:2     | rs10601222        | 0.0405 | 0.1518 | 0.2858 | 0.7344 |
| Acylcarnitine 8:2     | rs7154439         | 0.0405 | 0.1518 | 0.2858 | 0.7344 |
| Acylcarnitine 8:2     | rs11624523        | 0.0414 | 0.1518 | 0.3081 | 0.7344 |
| Succinate             | rs45593332        | 0.0324 | 0.6869 | 0.0671 | 0.7376 |
| Lactate               | rs111500198       | 0.0546 | 0.9960 | 0.0433 | 0.7432 |
| Urea                  | rs11624523        | 0.0328 | 0.2127 | 0.1724 | 0.7773 |
| Urea                  | rs6573908         | 0.0376 | 0.2127 | 0.1743 | 0.7773 |
| Acylcarnitine 4:0     | rs10685904*(-/-C) | 0.0305 | 0.5905 | 0.0629 | 0.8243 |
| Acylcarnitine 10:0    | rs111500198       | 0.0316 | 0.6962 | 0.0761 | 0.8371 |
| Guanidinoacetate      | rs111500198       | 0.4120 | 0.9587 | 0.0447 | 0.8513 |
| SM 38:1               | rs45593332        | 0.0452 | 0.8572 | 0.0388 | 0.8528 |
| Taurocholic acid      | rs111500198       | 0.0561 | 0.9745 | 0.0393 | 0.8649 |
| Glycocholic acid      | rs111500198       | 0.0342 | 0.7517 | 0.0719 | 0.8721 |
| Acylcarnitine 18:2    | rs45593332        | 0.0481 | 0.9286 | 0.1942 | 0.9212 |
| Acylcarnitine 14:0    | rs149651811       | 0.0415 | 0.9130 | 0.0662 | 0.9358 |
| Acylcarnitine 18:1    | rs45593332        | 0.0350 | 0.7700 | 0.1474 | 0.9662 |
| Acylcarnitine 16:0-OH | rs45593332        | 0.0402 | 0.8854 | 0.0664 | 0.9675 |
| Acylcarnitine 18:1-OH | rs45593332        | 0.0226 | 0.4978 | 0.1087 | 0.9724 |
| SM 42:2               | rs78852170        | 0.0292 | 0.6432 | 0.0883 | 0.9730 |

|                    |             |        |        |        |        |
|--------------------|-------------|--------|--------|--------|--------|
| Acylcarnitine 12:0 | rs149651811 | 0.0326 | 0.7182 | 0.0529 | 0.9752 |
| SM 36:1            | rs78852170  | 0.0279 | 0.6135 | 0.0640 | 0.9842 |
| Mannitol           | rs78852170  | 0.0186 | 0.4091 | 0.0677 | 0.9855 |

\*= rs10685904 already described as -/AC insertion, but not -/C insertion

**Supplementary Table S7.** Surrogate peptides and their mass transitions.

| Protein | Peptide sequence | Mass | DP | Q1    | Q3.1  | CE 1 | Q3.2  | CE 2 | Q3.3  | CE 3 |
|---------|------------------|------|----|-------|-------|------|-------|------|-------|------|
| NTCP    | GIYDGDLK         | 880  | 45 | 440.9 | 710.5 | 17   | 547.2 | 20   | 355.9 | 19   |
|         | GIYDGDLK*        | 888  | 45 | 444.9 | 718.4 | 17   | 555.4 | 20   | 359.9 | 19   |

Abbreviations: DP, declustering potential; CE, collision energy

**Supplementary Table S8.** Target regions of *SLC10A1* used for library preparation (hg19).

| chr   | start    | end      | strand | gene           | Exon         | transcript |
|-------|----------|----------|--------|----------------|--------------|------------|
| chr14 | 70242531 | 70243125 | -      | <i>SLC10A1</i> | 5            | NM_003049  |
| chr14 | 70245029 | 70245266 | -      | <i>SLC10A1</i> | 4            | NM_003049  |
| chr14 | 70245878 | 70246097 | -      | <i>SLC10A1</i> | 3            | NM_003049  |
| chr14 | 70252793 | 70253044 | -      | <i>SLC10A1</i> | 2            | NM_003049  |
| chr14 | 70263496 | 70266026 | -      | <i>SLC10A1</i> | 1 + promoter | NM_003049  |

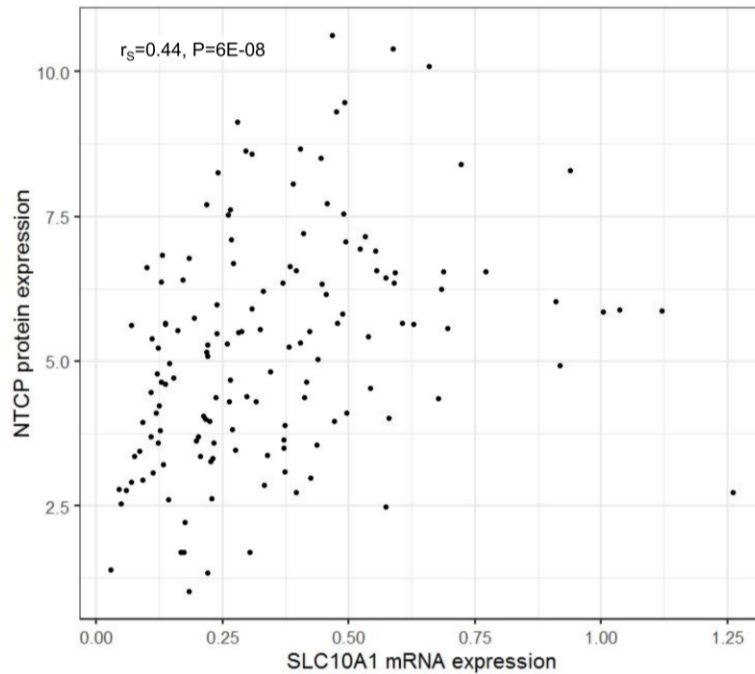

**Supplementary Figure S1.** Correlation analysis between *SLC10A1* mRNA expression and NTCP protein levels in liver tissue samples. mRNA expression levels were measured using qPCR and protein levels were determined using targeted LC-MS/MS. Spearman's rank correlation coefficient ( $r_s$ ) and corresponding unadjusted P-value is shown.

new\_70252701 G>A

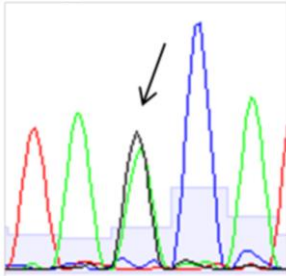

**Supplementary Figure S2.** Confirmation of the novel genetic variant chr14.g.70252701G>A found by next-generation-sequencing using Sanger sequencing. The figure shows the electropherogram of the respective sample with the arrow pointing to the location of the nucleotide substitution.



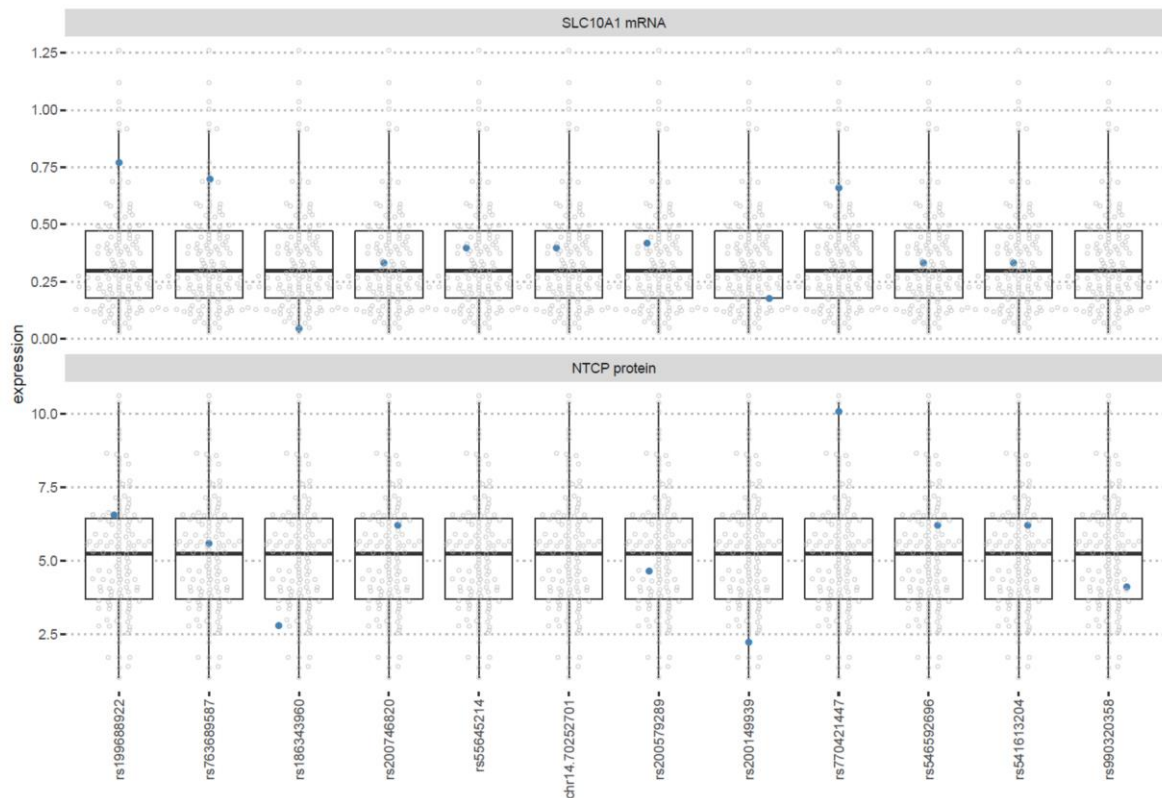

**Supplementary Figure S3.** Box scatter plots of *SLC10A1* mRNA expression and NTCP protein levels for 12 rare variants, including the two missense variants rs200149939 and rs200746820. Heterozygous carriers are highlighted using blue solid points, while the reference samples are displayed using grey open circles. mRNA expression was measured using qPCR while the NTCP protein levels were determined using LC–MS/MS-based targeted proteomics. Due to missing mRNA expression and protein abundance data for some subjects, the respective sample carrying the variant allele can be missing. The lower and upper hinges of the boxes correspond to the 25<sup>th</sup> and 75<sup>th</sup> percentiles. The upper and lower whisker extends from the hinge to the largest or smallest value no further than 1.5 x inter-quartile range from the hinge.

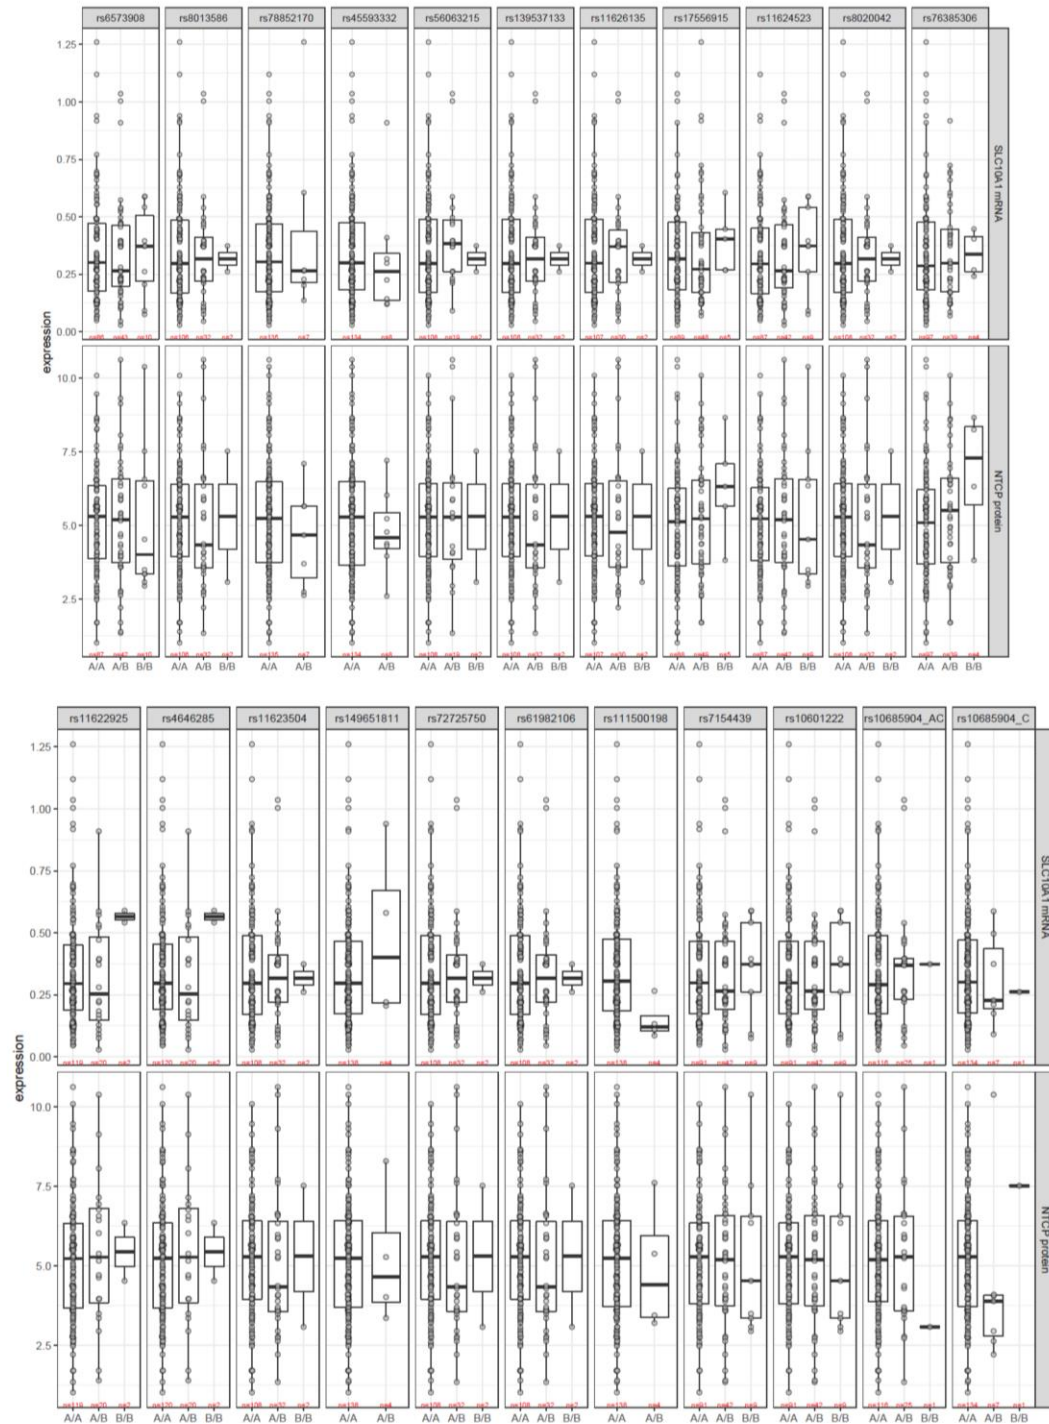

**Supplementary Figure S4.** Association analysis between common genetic variants and either mRNA expression or protein levels using box scatter plots. The lower and upper hinges of the boxes correspond to the 25<sup>th</sup> and 75<sup>th</sup> percentiles. The upper and lower whisker extends from the hinge to the largest or smallest value no further than 1.5 x inter-quartile range from the hinge.

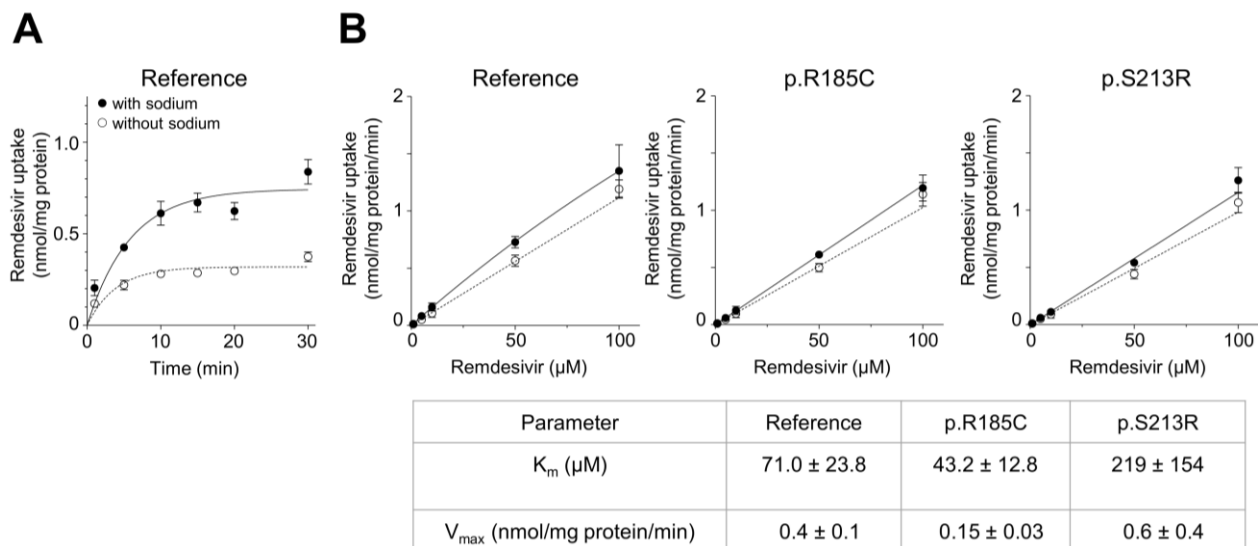

**Supplementary Figure S5.** Analysis of remdesivir transport by NTCP. **(A)** Time-dependent uptake of 5  $\mu\text{M}$  remdesivir into HEK cells stably expressing NTCP reference in the presence (filled circle) or absence (open circle) of sodium. Data are means  $\pm$  SD of 3 wells. **(B)** Concentration-dependent uptake of remdesivir into HEK cells stably expressing NTCP reference sequence or the respective missense variant in the presence (filled circle) or absence (open circle) of sodium determined at an incubation time of 10 min. Data are means  $\pm$  SD of 9 wells. Kinetic parameters were obtained by subtracting remdesivir uptake in the absence of sodium from the uptake in the presence of sodium.

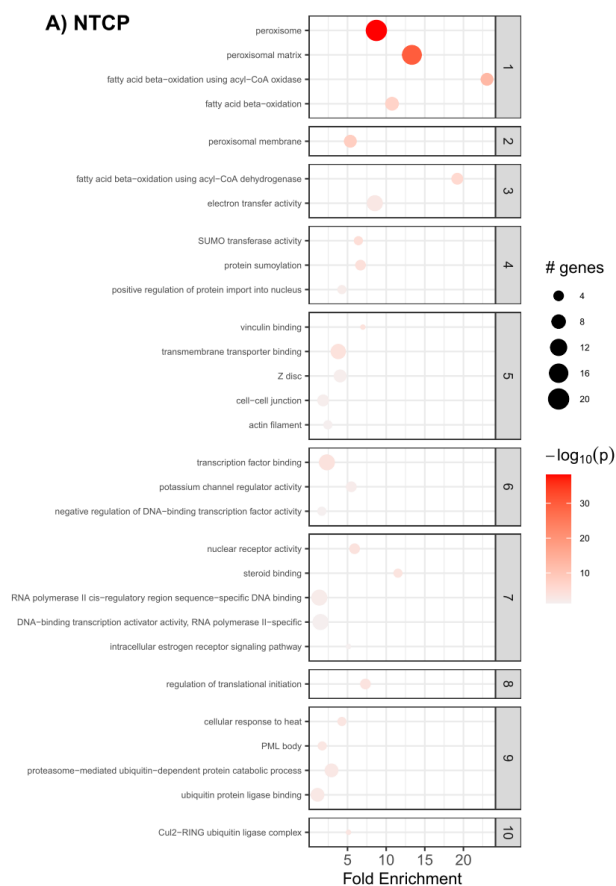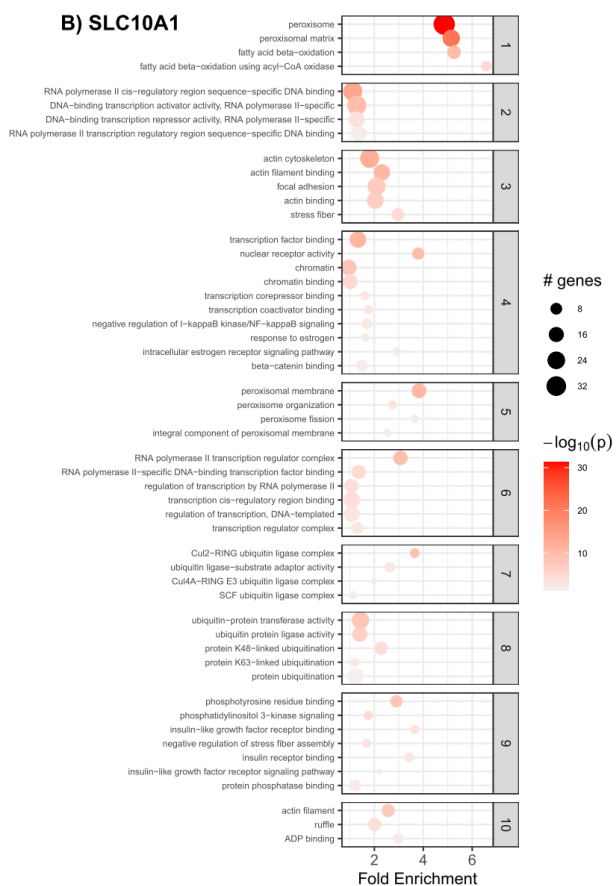

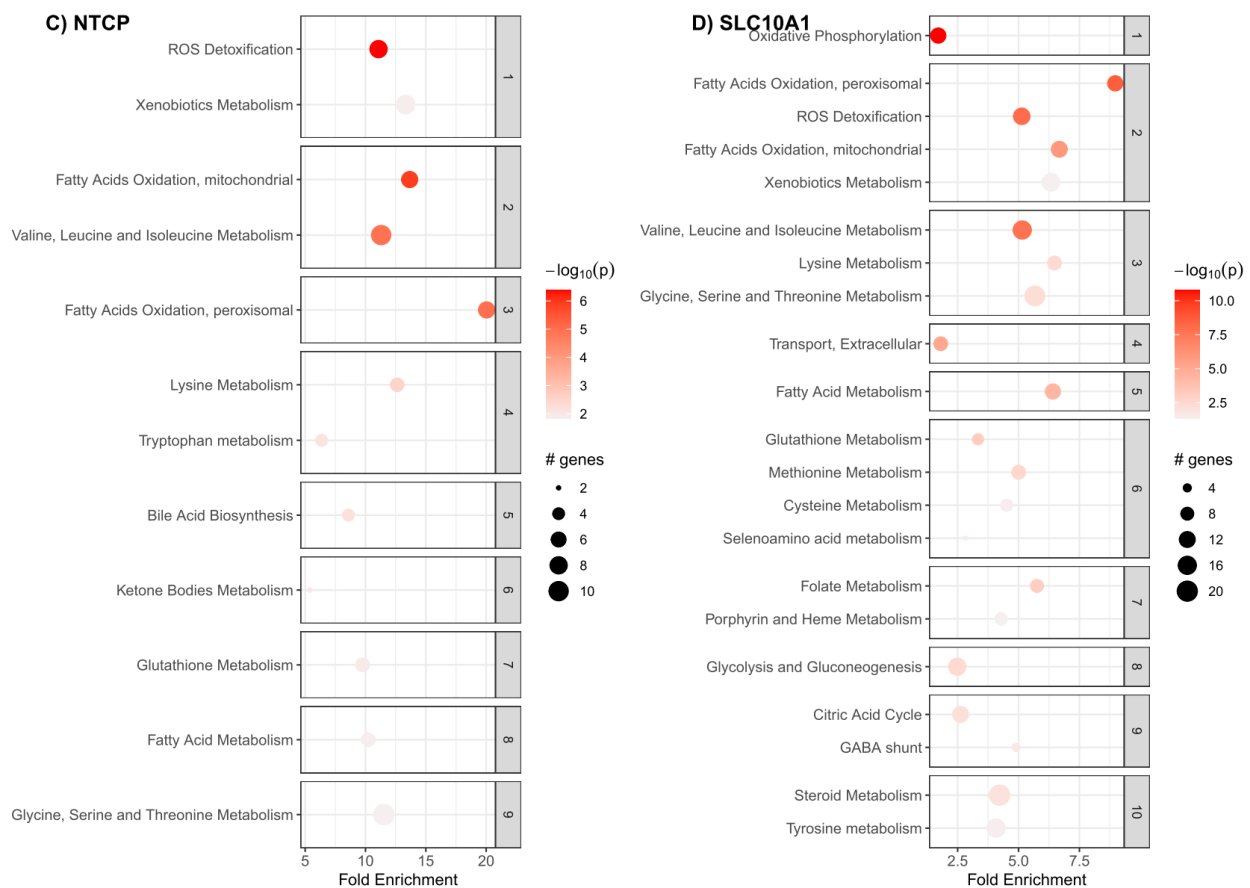

**Supplementary Figure S6.** Pathway enrichment results of NTCP protein and *SLC10A1* mRNA expression levels (determined by qPCR) correlated to HTA2.0 gene expression levels using GO (A, B) and custom gene sets derived from Gaude et al. [65]. (C, D) using R package pathfindR. Benjamini-Hochberg adjusted P-values were applied. The x-axis indicates fold enrichment values; the y-axis indicates the enriched pathways. The size of the bubble corresponds to the number of correlated genes in the given pathway. The orange color gradient illustrates the lowest  $-\log_{10}(P\text{-values})$  after ten iterations. The numbers on the right side indicate the hierarchical cluster assignments.

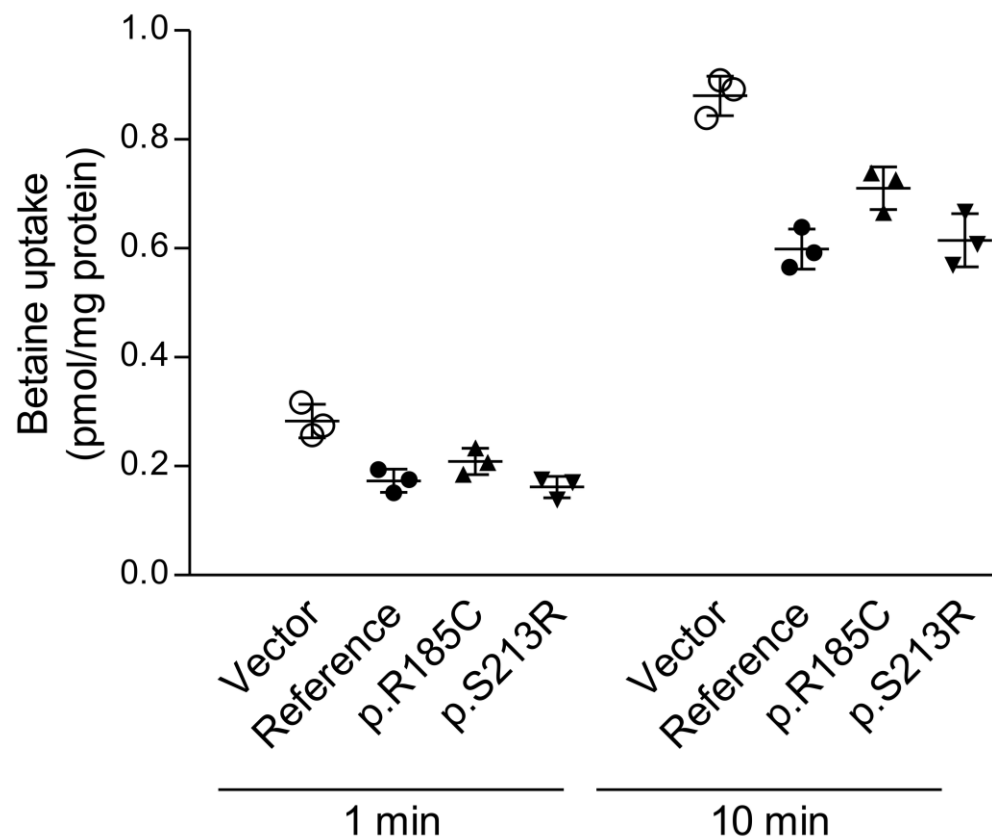

**Supplementary Figure S7.** Analysis of betaine transport by NTCP. Accumulation of 100 nM betaine into vector-transfected and NTCP-transfected HEK cells was measured after 1 and 10 min. Data are means  $\pm$  SD of 3 wells.

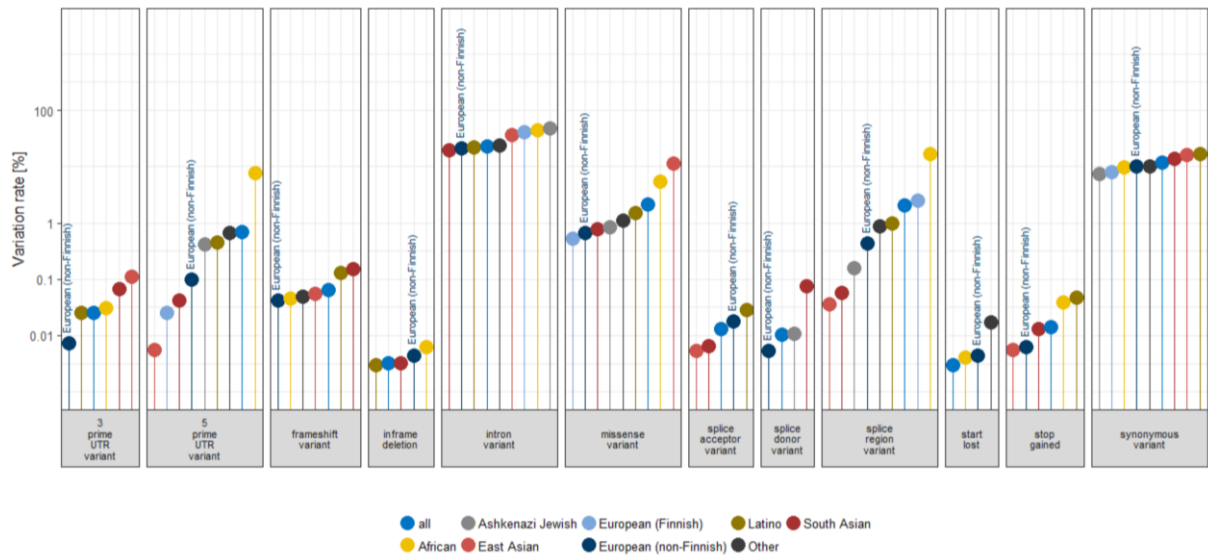

**Supplementary Figure S8.** Comparison of genetic variants occurring in the *SLC10A1* locus according to the gnomAD browser (gnomAD\_v2.1\_ENSG00000100652\_2019\_03\_+UTR, data accessed in March 2019) stratified by population and functional annotation using variation rates. Variation rates for each population are calculated as follows:  $\sum \text{MAF} \times \text{npop} / \text{median}(\text{npop})$  where npop is the corresponding allele sample size. Of note, the median number of included samples or the allele sample size strongly differs as follows: all populations (250,778), Africans (16,254), Ashkenazi Jews (9,690), East Asians (18,390), European Finns (21,590), European non-Finns (113,420), Latinos (34,546), Others (6,135), South Asians (30,552). Variation rate [%] is given on the log10-transformed y-axis.

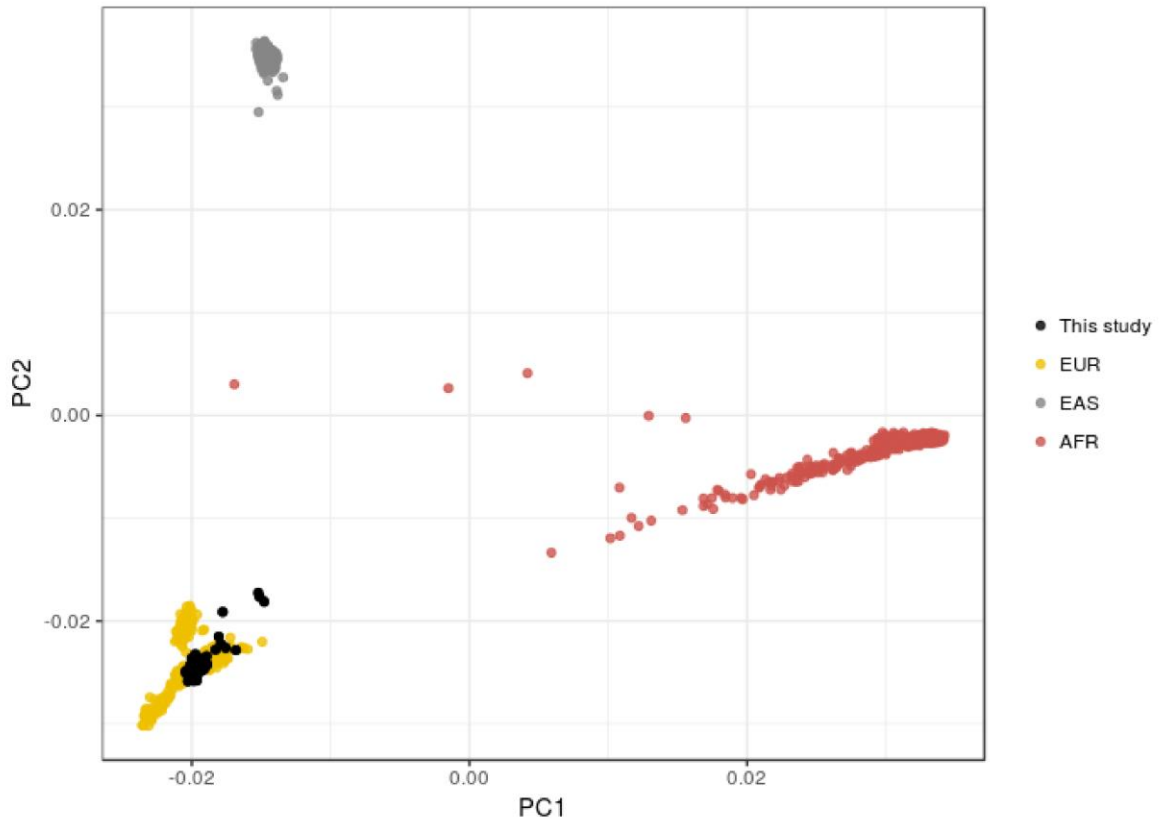

**Supplementary Figure S9.** Principal components analysis (PCA) of individuals from the liver cohort and subjects from different ethnicities of the 1000 Genomes project (1000G phase 3 individuals) based on 236,019 genotyped variants. PCA is based on the variance-standardized relationship matrix and was calculated using plink v1.9. The East Asian (EAS) population contains samples from CDX (93), CHB (103), CHS (105), JPT (104) and KHV (99), the African (AFR) population contains samples from ACB (96), ASW (61), ESN (99), GWD (113), LWK (99), MSL (85), YRI (108) and the European (EUR) population consists of CEU (99), FIN (99), GBR (91), IBS (107) and TSI (107). Further details on the populations and the used 1000G Phase3 data can be found at [https://mathgen.stats.ox.ac.uk/impute/1000GP\\_Phase3.html](https://mathgen.stats.ox.ac.uk/impute/1000GP_Phase3.html). Individuals from the liver cohort are colored in black and 1000 Genomes AFR, EAS, EUR samples are colored in red, grey, and yellow, respectively. Cluster analysis of the 143 individuals from the liver cohort indicates that all samples were of European ancestry.
